# Supplementary material for: Synthesis, reactivity and complexation studies of N,S exo-heterodisubstituted o-carborane ligands. Carborane as a platform to produce the uncommon bidentate chelating (pyridine)N-C-C-C-S(H) motif
Source: Royal Society of Chemistry journal article supplement (doi:10.1039/b715362g), 2008-01-01

Figure S.1. UV spectra of  $1 \times 10^{-4}$  mol/L of  $[\text{NMe}_4][7\text{-SEt-}n\text{-ido-7,8-C}_2\text{B}_9\text{H}_{11}]$  ( $[\text{NMe}_4][\mathbf{9}]$ ).

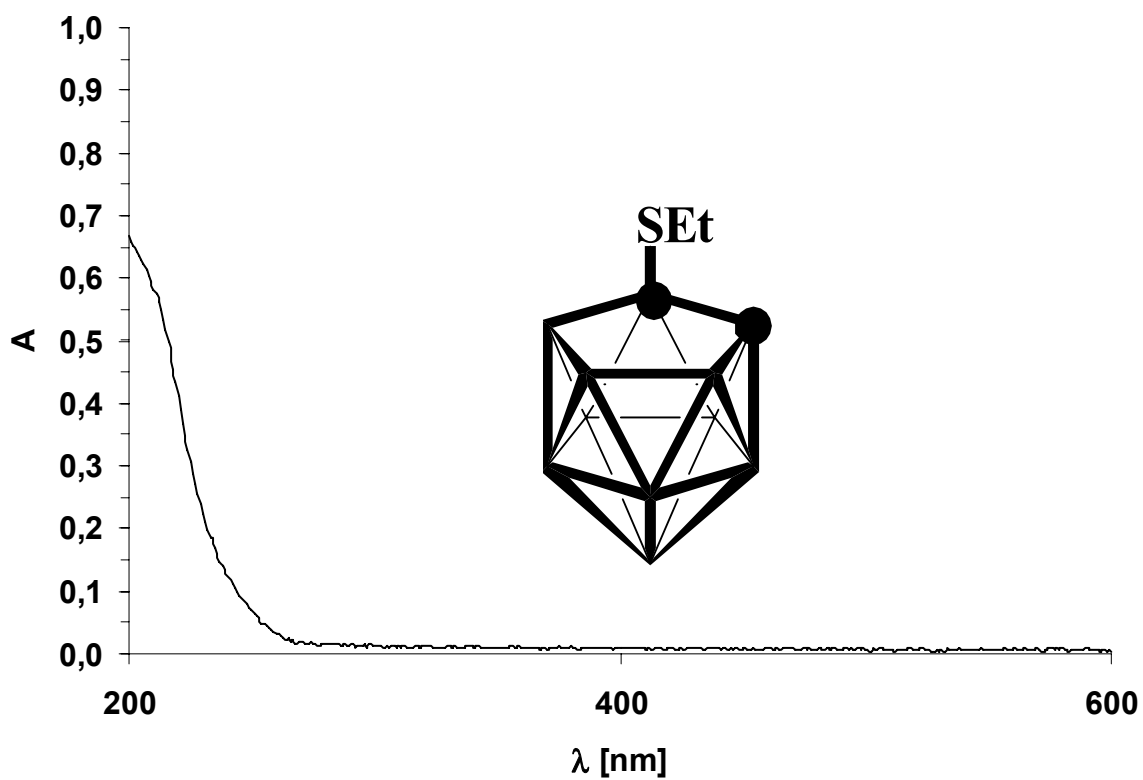

Figure S.2. UV spectra of  $2 \times 10^{-5}$  mol/L of  $[\text{NMe}_4][7\text{-Ph-8-SPh-nido-7,8-C}_2\text{B}_9\text{H}_{10}]$  ( $[\text{NMe}_4][\mathbf{10}]$ ).

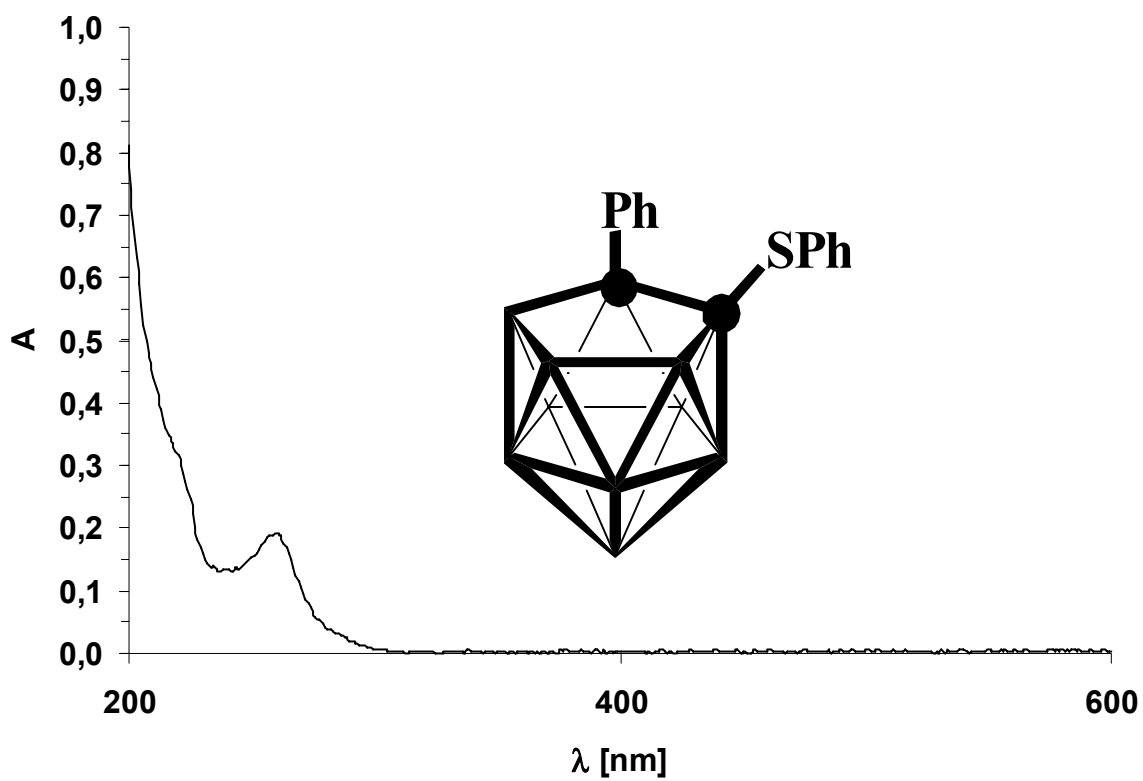

Figure S.3. UV spectra of  $5 \times 10^{-5}$  mol/L of  $[\text{NMe}_4][7\text{-Me-8-SPh-nido-7,8-C}_2\text{B}_9\text{H}_{10}]$  ( $[\text{NMe}_4][\mathbf{11}]$ ).

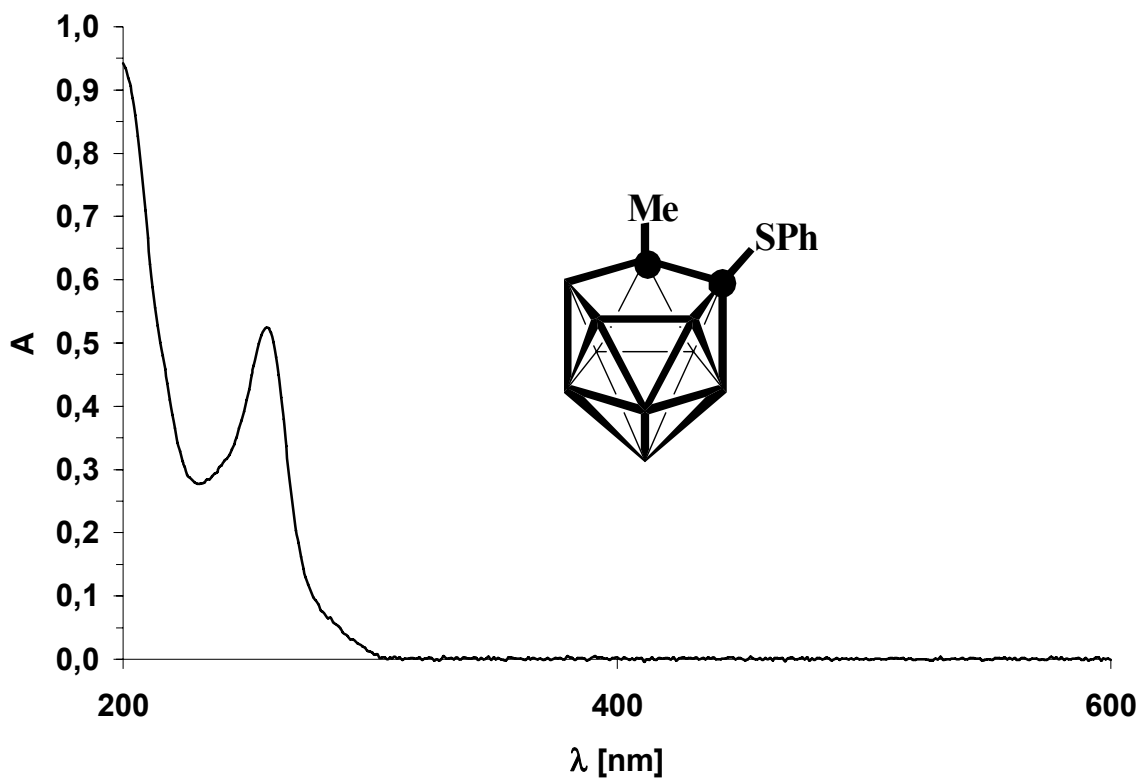

Figure S.4. UV spectra of  $5 \times 10^{-5}$  mol/L of  $[\text{NMe}_4][7\text{-Pyridyl-8-SEt-}n\text{-ido-7,8-C}_2\text{B}_9\text{H}_{10}]$  ( $[\text{NMe}_4][\mathbf{4}]$ ).

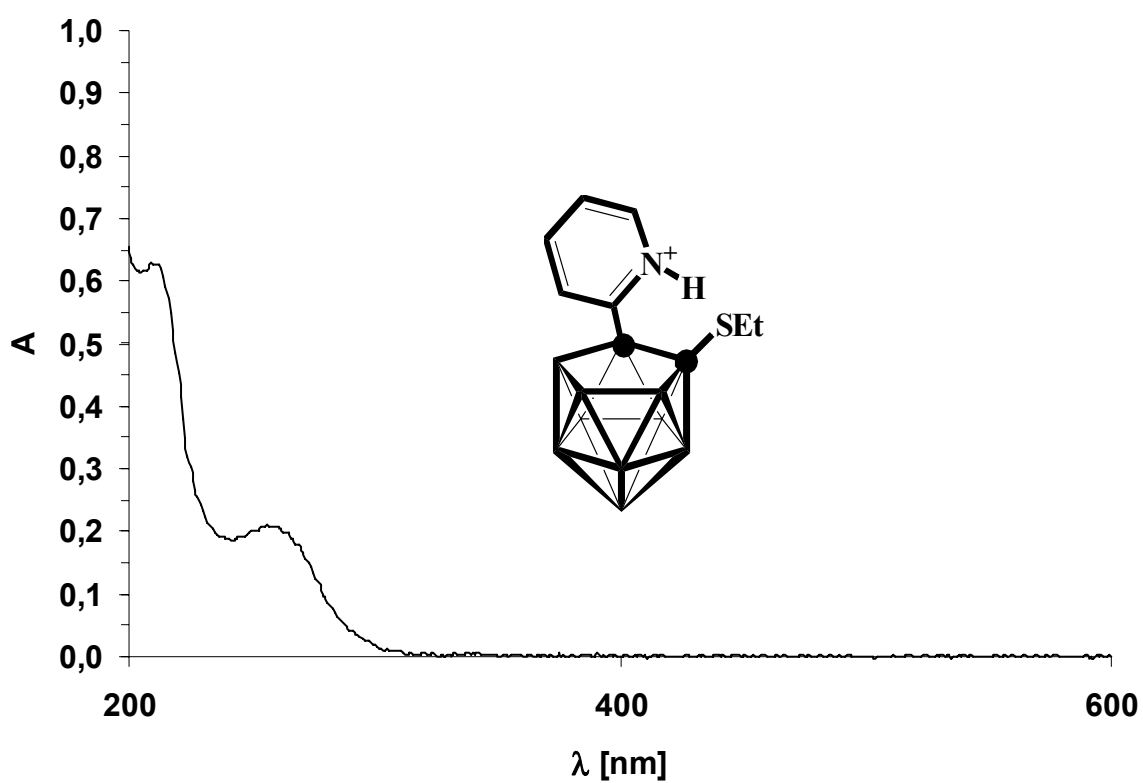

Figure S.5. UV spectra of  $1 \times 10^{-4}$  mol/L of  $[\text{NMe}_4][7\text{-Pyridyl-8-SiPr-nido-7,8-C}_2\text{B}_9\text{H}_{10}]$  ( $[\text{NMe}_4][\mathbf{5}]$ ).

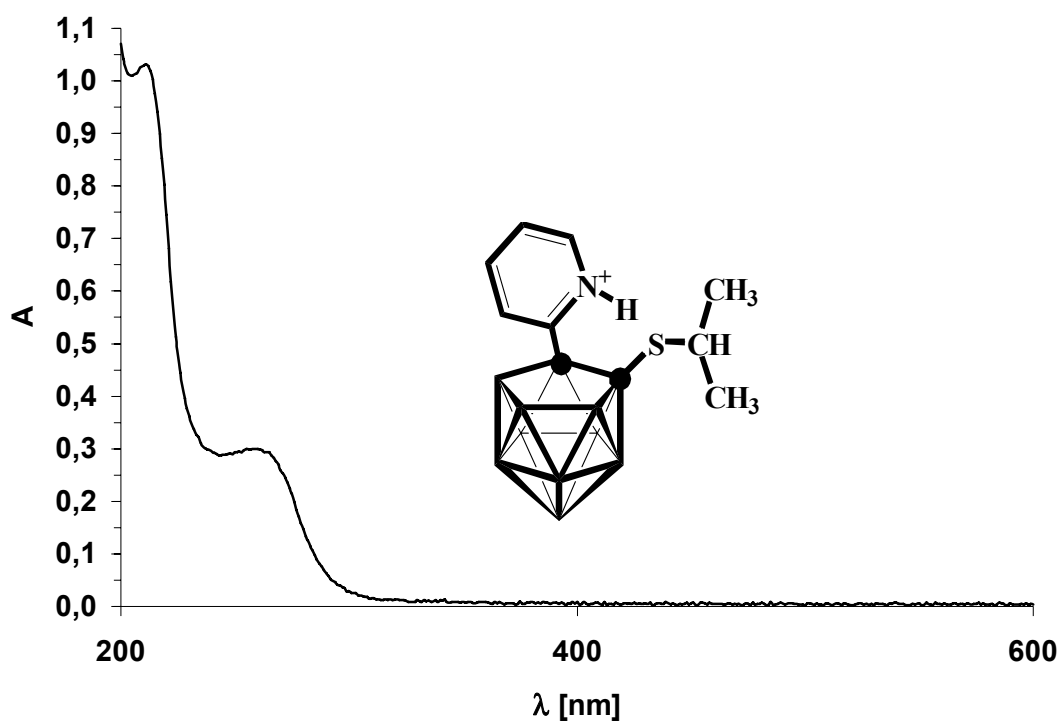

Figure S.6. UV spectra of  $1 \times 10^{-3}$  mol/L of  $[\text{NMe}_4][7\text{-Pyridyl-}n\text{id}\text{o-}7,8\text{-C}_2\text{B}_9\text{H}_{11}]$  ( $[\text{NMe}_4][\mathbf{12}]$ ).

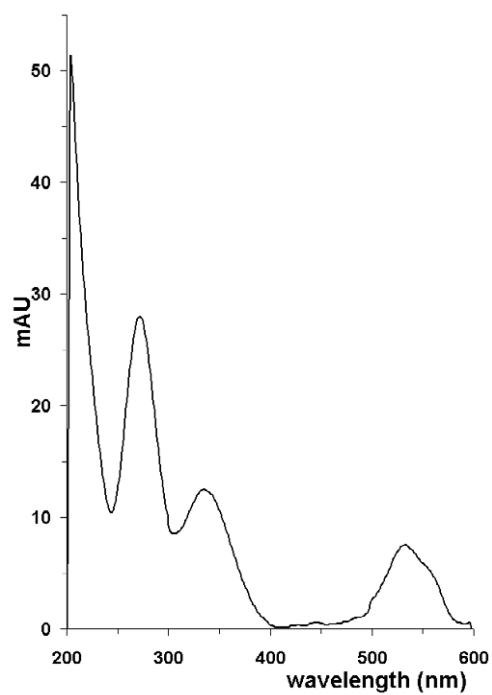

Figure S. 7: Chiral separation of  $[\text{NMe}_4][7\text{-SEt-}n\text{-ido-7,8-C}_2\text{B}_9\text{H}_{11}]$  ( $[\text{NMe}_4][\mathbf{9}]$ ). with 2.3 mmol/L of  $\alpha$ -cyclodextrin; mobility difference was,  $\Delta\mu = 1.69$ . The separation conditions: The polyacrylamide coated fused silica capillary of 75  $\mu\text{m}$ ; the separation length of 53.0 cm. Background electrolyte: Tris and methylsulfonic acid in water-methanol 70:30 % (v/v) mixture in concentration that would give a buffer of pH 7.3 and  $I=11$  mmol/L in aqueous solution. Injected sample concentration was 1 mmol/L.

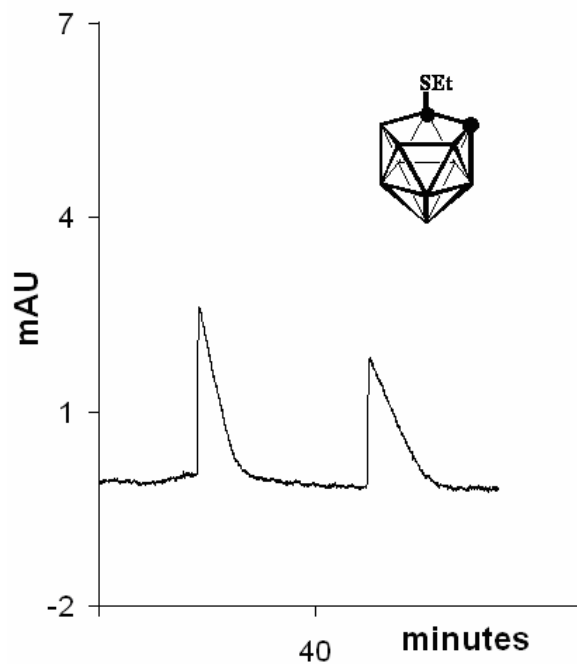

Figure S. 8: Chiral separation of  $[\text{NMe}_4][7\text{-Ph-8-SPh-}nido\text{-}7,8\text{-C}_2\text{B}_9\text{H}_{10}]$  ( $[\text{NMe}_4][\mathbf{10}]$ ) with 14 mmol/L of  $\alpha$ -cyclodextrin; mobility difference was,  $\Delta\mu = 0.08$ . For detailed separation conditions (see Figure S.7).

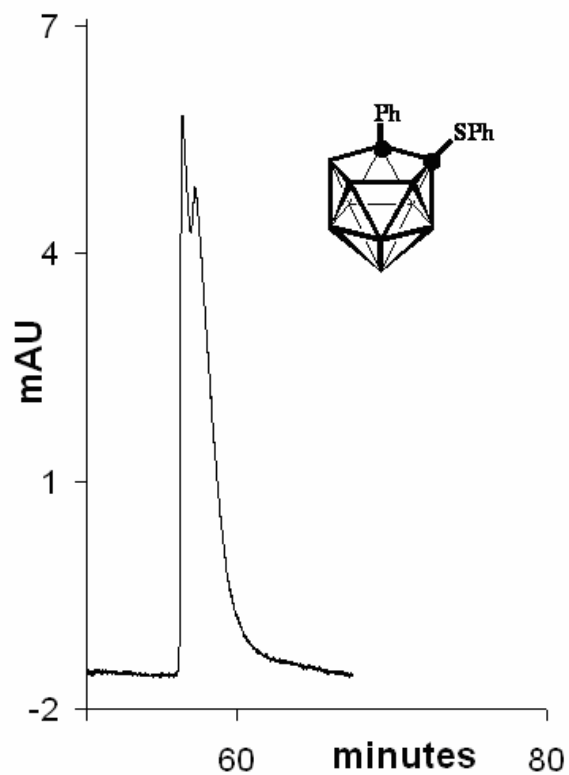



Figure S. 9: Chiral separation of  $[\text{NMe}_4][7\text{-Me-8-SPh-}n\text{-ido-7,8-C}_2\text{B}_9\text{H}_{10}]$  ( $[\text{NMe}_4][\mathbf{11}]$ ) with 7 mmol/L of  $\alpha$ -cyclodextrin; mobility difference was,  $\Delta\mu = 0.09$ .  
For detailed separation conditions (see Figure S.7).

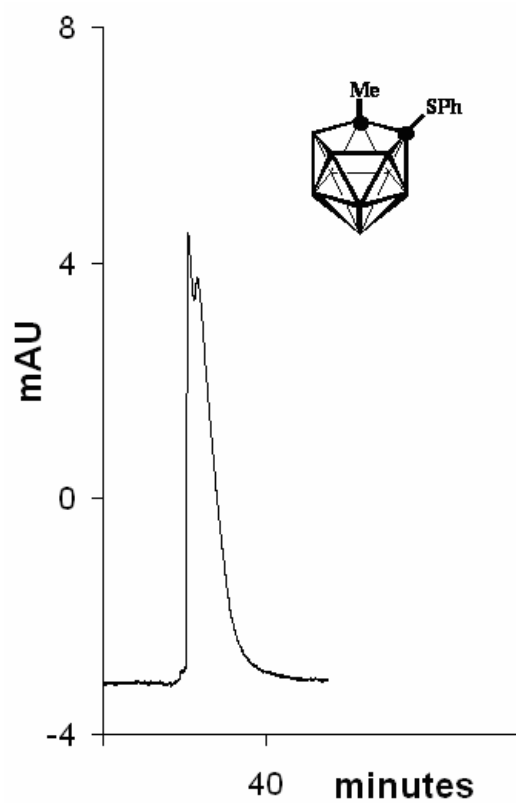

Figure S. 9: Chiral separation of  $[\text{NMe}_4][7\text{-Pyridyl-8-SiPr-}n\text{-ido-7,8-C}_2\text{B}_9\text{H}_{10}]$  ( $[\text{NMe}_4][\mathbf{5}]$ ) with 7 mmol/L of  $\alpha$ -cyclodextrin; mobility difference was,  $\Delta\mu = 0.09$ .  
For detailed separation conditions (see Figure S.7).

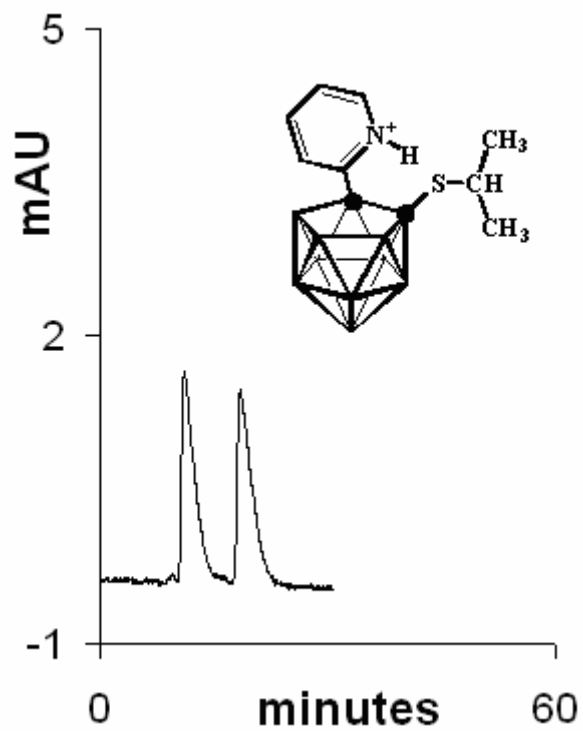

Supplement: b715362g.pdf [file b715362g.pdf]
